# Supplementary material for: Turn-on fluorescence of ruthenium pyrene complexes in response to bovine serum albumin
Source: Royal Society of Chemistry journal article supplement (doi:10.1039/d3dt02289g), 2023-01-01
Supplement: d3dt02289g1.pdf [file d3dt02289g1.pdf]

## **Supplementary information**

# **Turn-on fluorescence of ruthenium pyrene complexes in response to bovine serum albumin**

Saša Opačak, Margareta Pernar Kovač, Anamaria  
Brozovic<sup>a</sup>, Ivo Piantanida\*, Srećko I. Kirin\*

# Contents

|                                                                                            |    |
|--------------------------------------------------------------------------------------------|----|
| Compounds .....                                                                            | 4  |
| NMR spectra .....                                                                          | 5  |
| <b>P</b> <sup>1</sup> H NMR (300 MHz, CDCl <sub>3</sub> ) .....                            | 5  |
| <b>L</b> <sup>1</sup> H NMR (300 MHz, CDCl <sub>3</sub> ) .....                            | 6  |
| <b>L</b> APT NMR (151 MHz, CDCl <sub>3</sub> ) .....                                       | 7  |
| <b>L</b> <sup>31</sup> P NMR (243 MHz, CDCl <sub>3</sub> ) .....                           | 8  |
| <b>1</b> <sup>1</sup> H NMR (300 MHz, CDCl <sub>3</sub> ) .....                            | 9  |
| <b>1</b> APT NMR (151 MHz, CDCl <sub>3</sub> ) .....                                       | 9  |
| <b>2</b> <sup>31</sup> P NMR (243 MHz, CDCl <sub>3</sub> ) .....                           | 11 |
| <b>2</b> <sup>1</sup> H NMR (300 MHz, CDCl <sub>3</sub> ) .....                            | 11 |
| <b>2</b> <sup>13</sup> C NMR (151 MHz, CDCl <sub>3</sub> ) .....                           | 12 |
| <b>2</b> <sup>31</sup> P NMR (243 MHz, CDCl <sub>3</sub> ) .....                           | 13 |
| UV/Vis Experiments .....                                                                   | 14 |
| Variable concentration (and temperature) spectra of <b>1</b> in water .....                | 14 |
| Variable concentration spectra of <b>1</b> in DMSO .....                                   | 14 |
| Variable concentration (and temperature) spectra of <b>2</b> in DMSO .....                 | 15 |
| Variable concentration (and temperature) spectra of <b>2</b> in Na-cacodylate buffer ..... | 15 |
| dTM measurements .....                                                                     | 16 |
| Fluorescence experiments .....                                                             | 17 |
| Variable concentration spectra of <b>1</b> in DMSO .....                                   | 17 |
| Excitation spectra of <b>1</b> .....                                                       | 17 |
| Variable concentration (and temperature) spectra of <b>2</b> in DMSO .....                 | 18 |
| Variable concentration (and temperature) spectra of <b>2</b> in Na-cacodylate buffer ..... | 18 |
| BSA titration of <b>1</b> .....                                                            | 18 |
| BSA titration of <b>2</b> .....                                                            | 19 |
| Time resolved fluorescence measurements .....                                              | 20 |
| ctDNA titration of <b>1</b> .....                                                          | 21 |
| ctDNA titration of <b>2</b> .....                                                          | 21 |
| Competition experiments ES283 titration of ctDNA + ethidium bromide .....                  | 22 |
| Competition experiments ES282 titration of ctDNA + ethidium bromide .....                  | 22 |
| CD spectroscopy .....                                                                      | 23 |
| Titration of <b>1</b> with ctDNA .....                                                     | 23 |
| Titration of <b>2</b> with ctDNA .....                                                     | 23 |
| Biology .....                                                                              | 24 |
| Toxicity on HeLa cells .....                                                               | 24 |



## Compounds

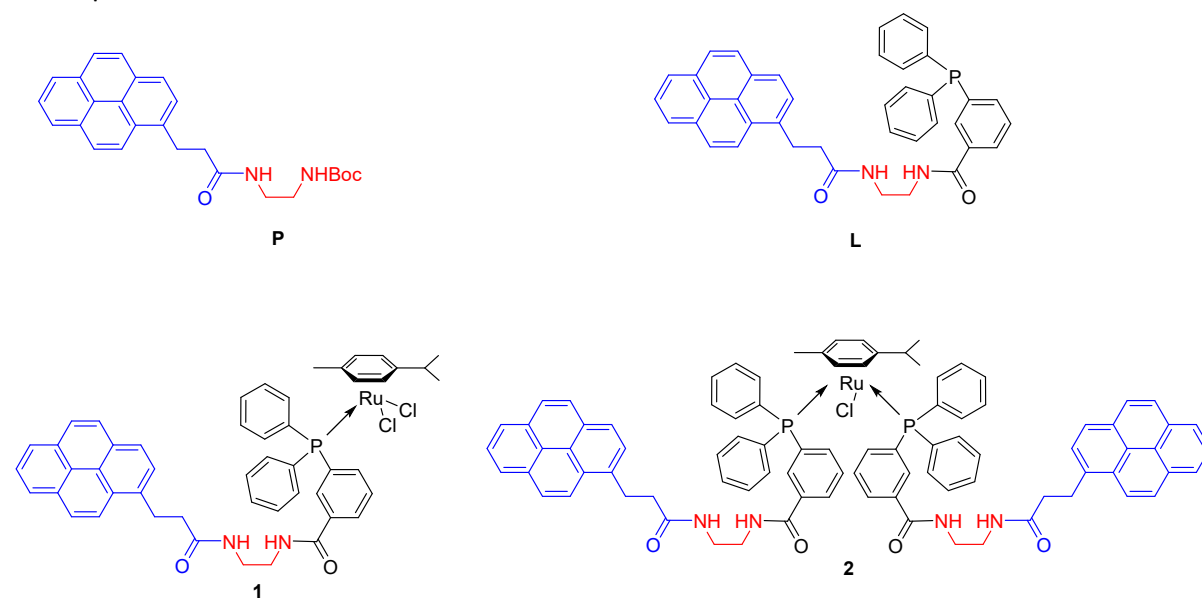

**Figure s1** Compounds presented in this paper

# NMR spectra

$^1\text{H}$  NMR (300 MHz,  $\text{CDCl}_3$ )

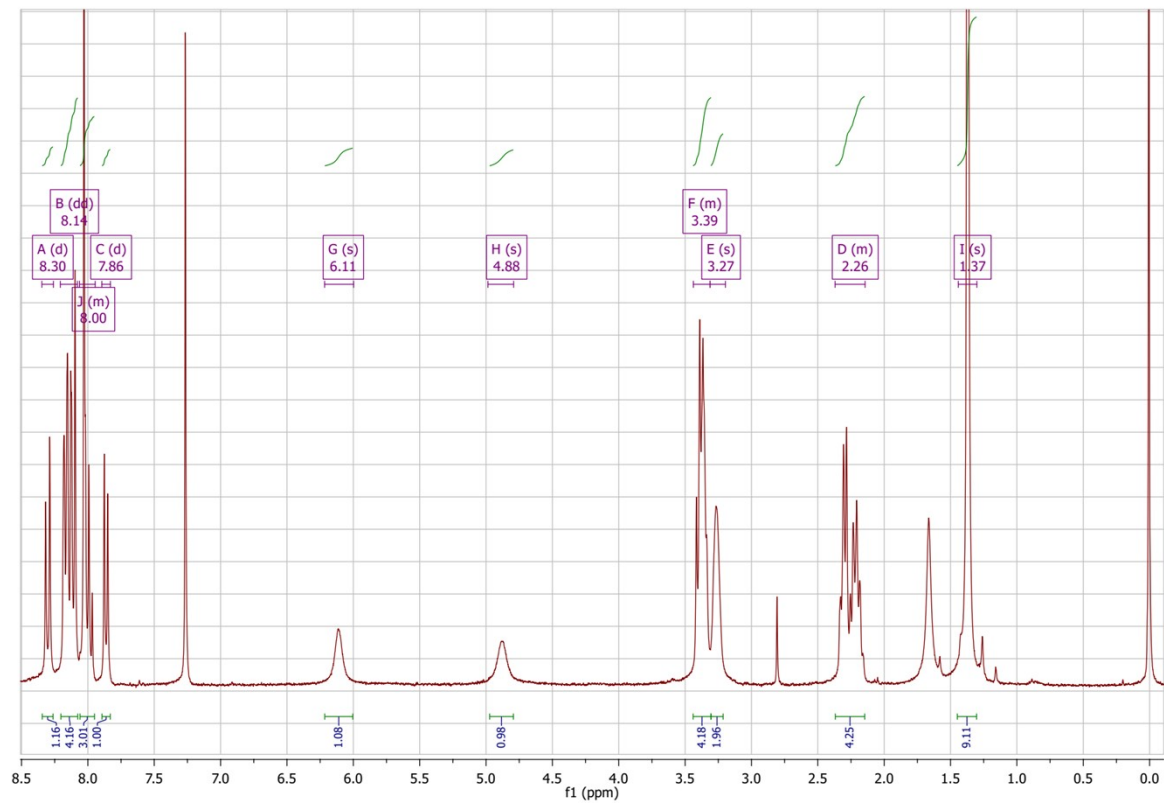

L <sup>1</sup>H NMR (300 MHz, CDCl<sub>3</sub>)

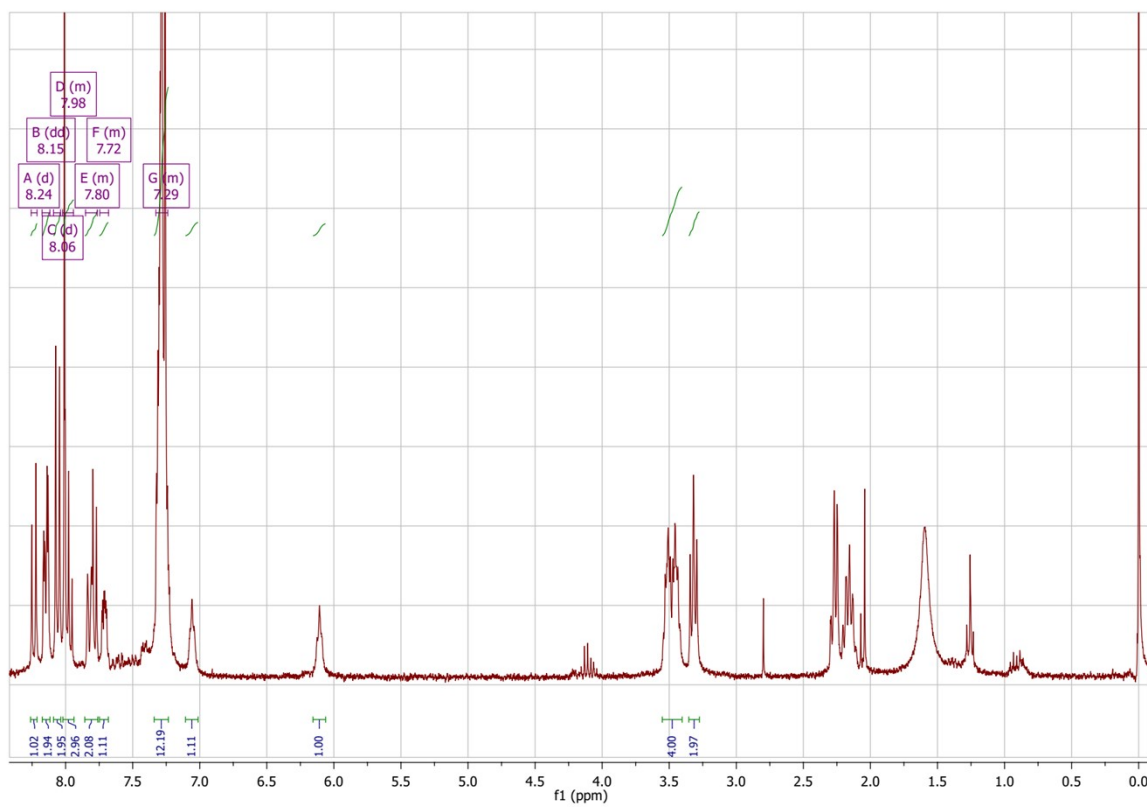

LAPT NMR (151 MHz, CDCl<sub>3</sub>)

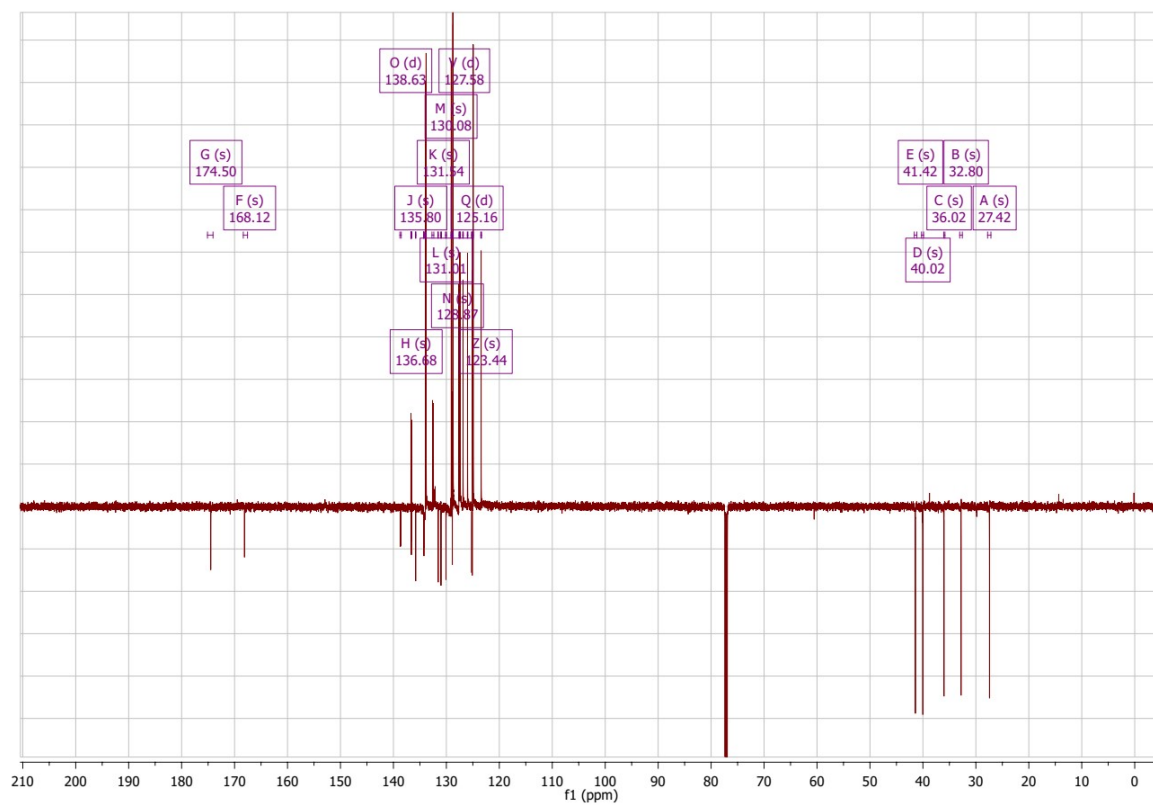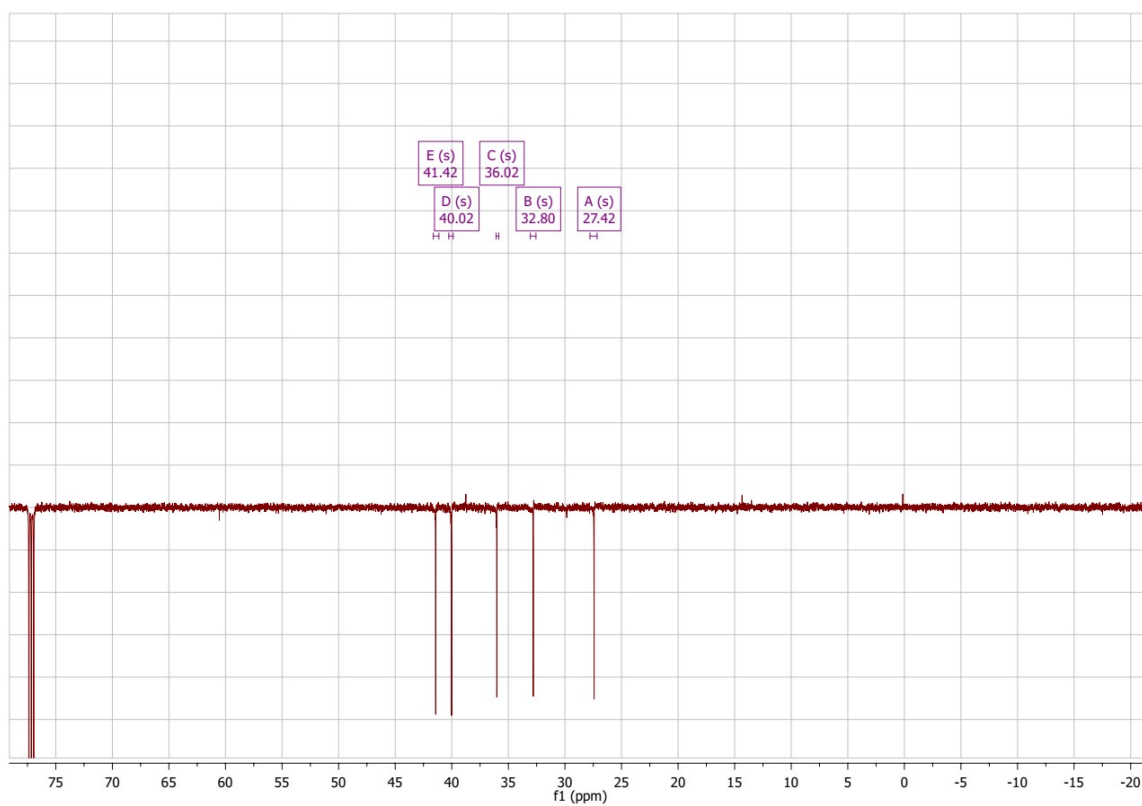

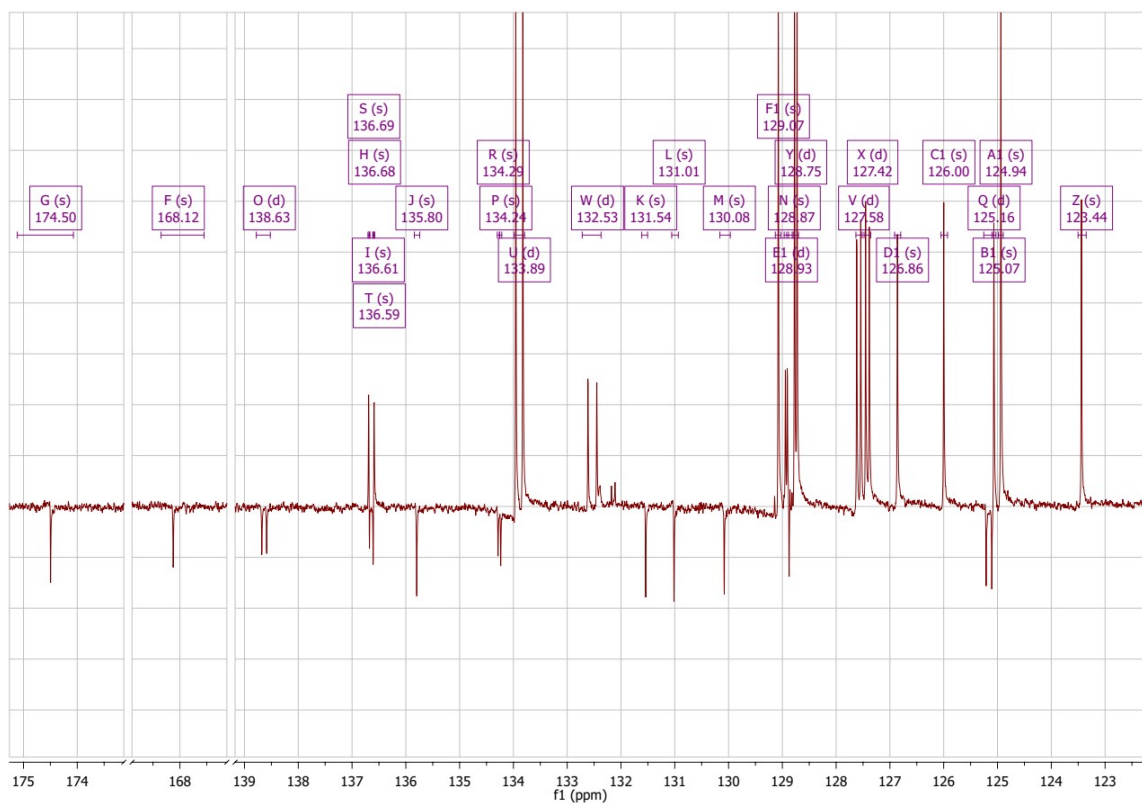

<sup>31</sup>P NMR (243 MHz, CDCl<sub>3</sub>)

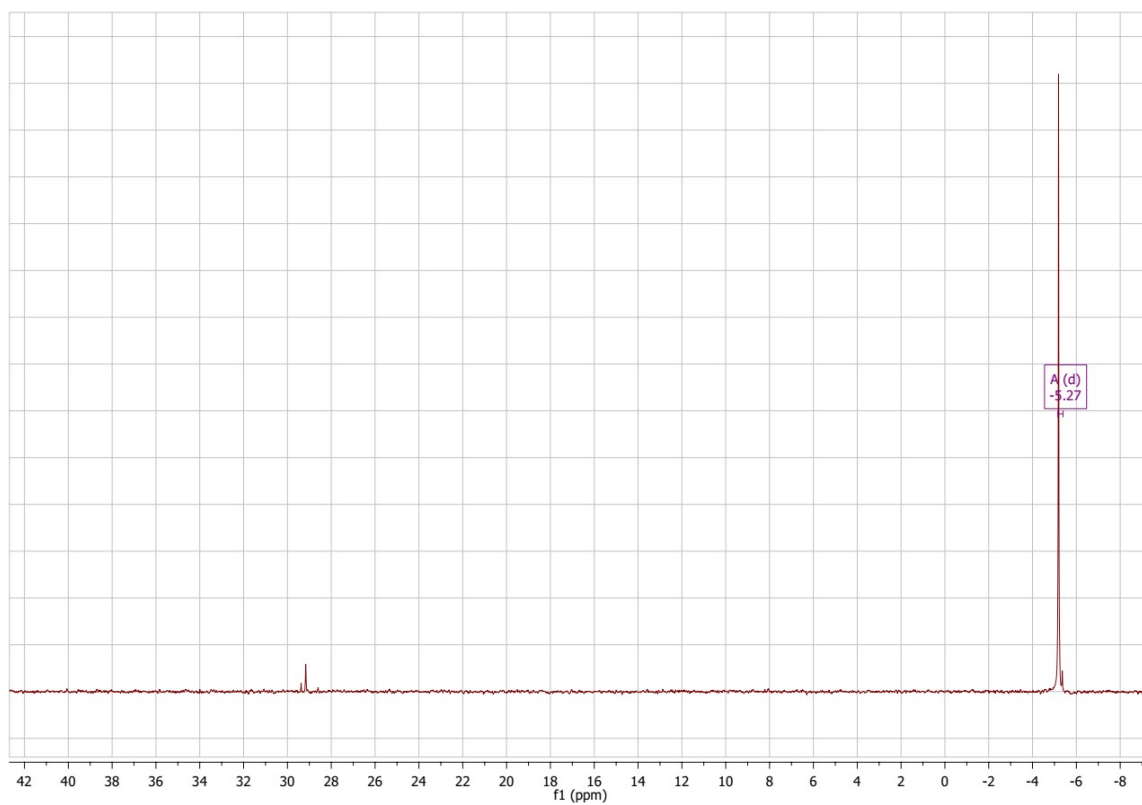



$^1\text{H}$  NMR (300 MHz,  $\text{CDCl}_3$ )

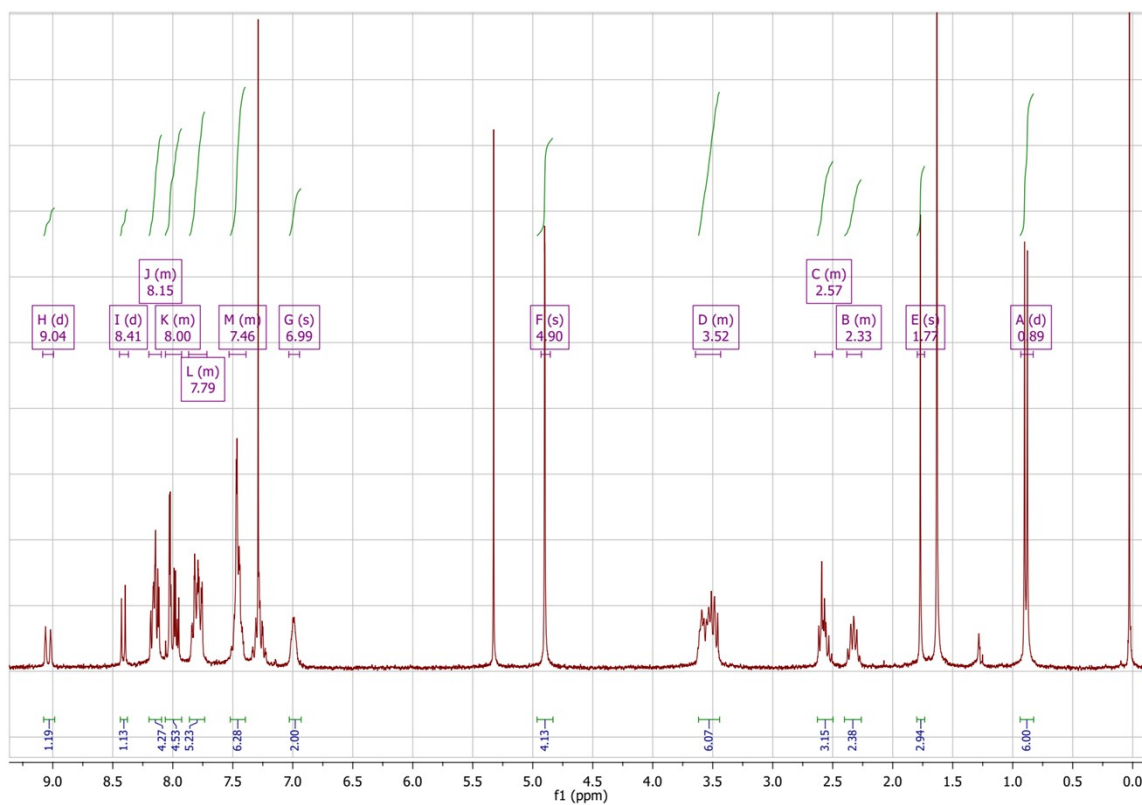

$^{13}\text{C}$  NMR (151 MHz,  $\text{CDCl}_3$ )

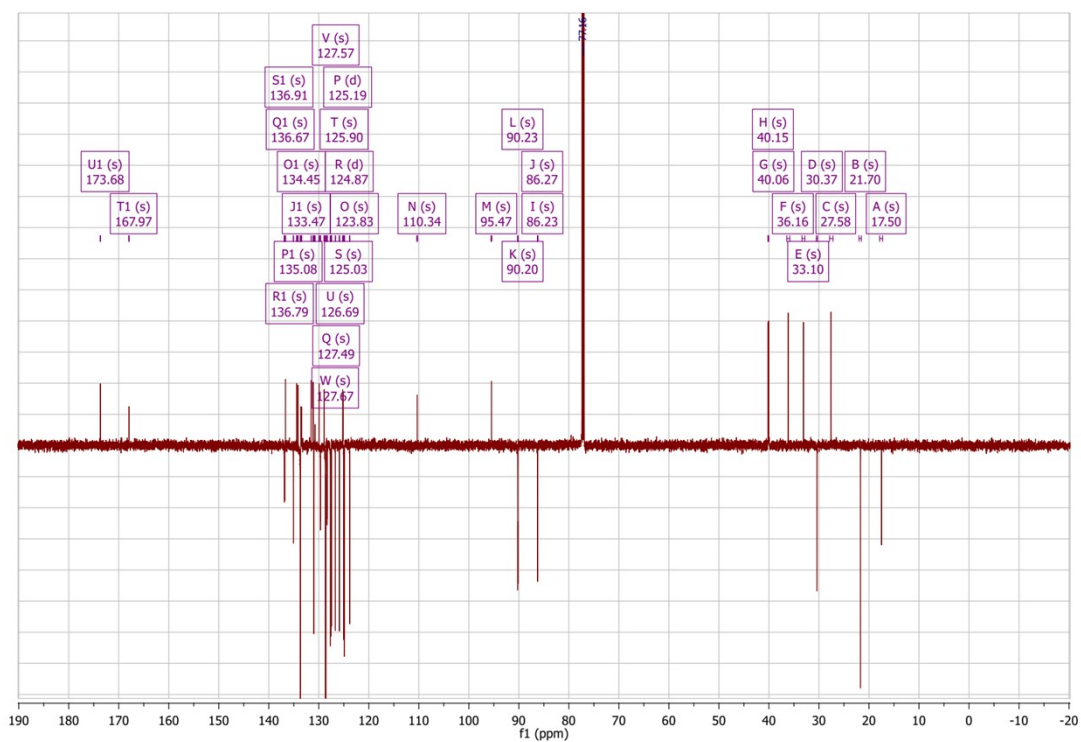

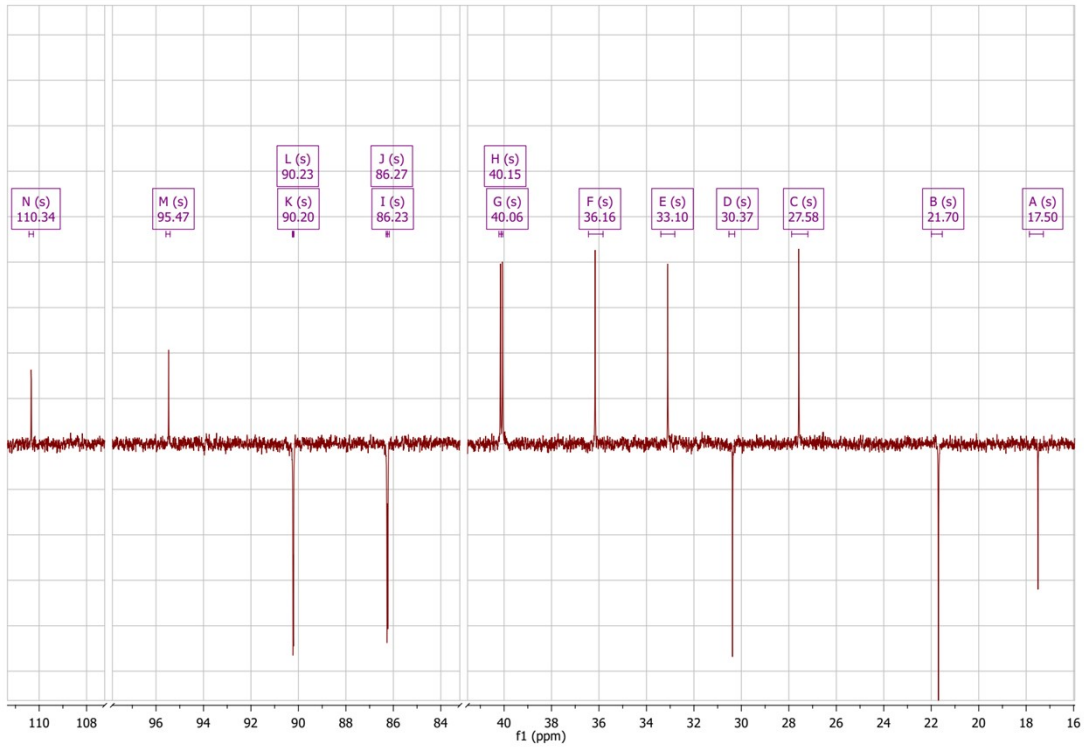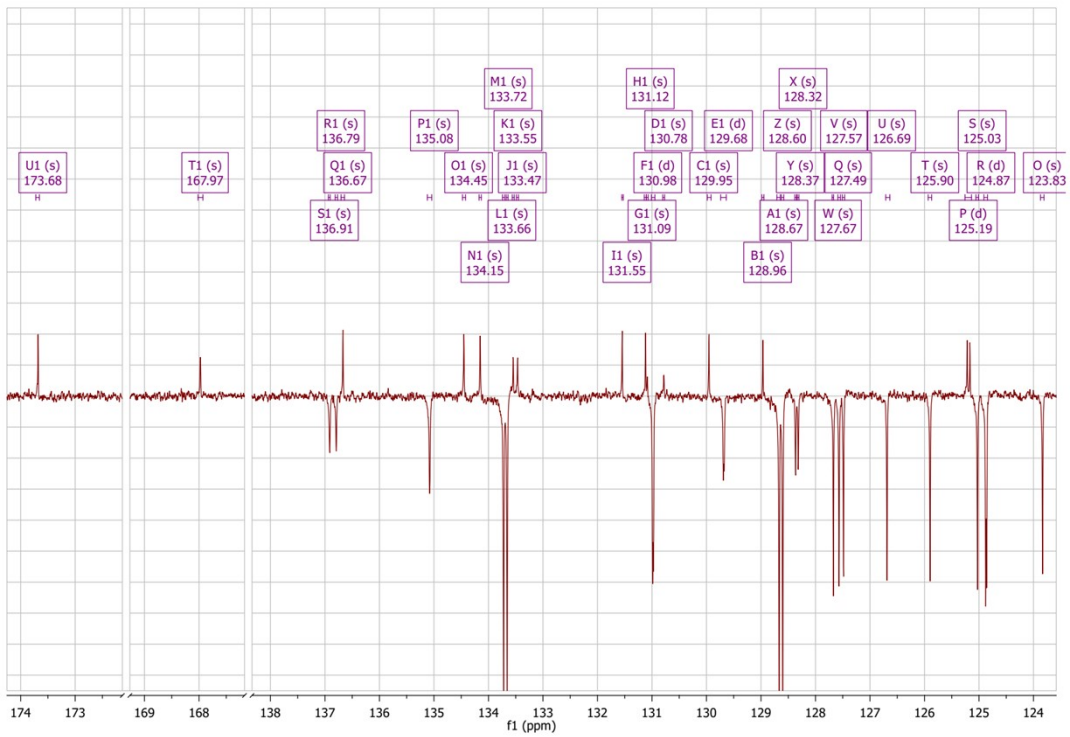

$^2 \text{ } ^{31}\text{P}$  NMR (243 MHz,  $\text{CDCl}_3$ )

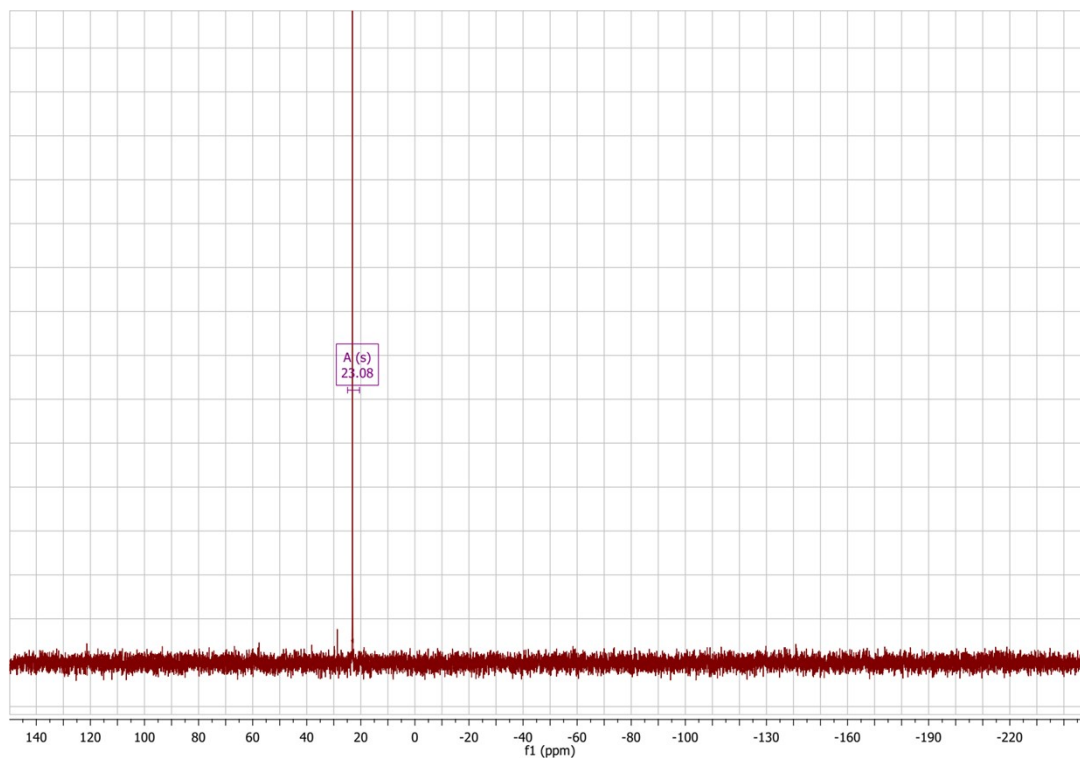

$^2 \text{ } ^1\text{H}$  NMR (300 MHz,  $\text{CDCl}_3$ )

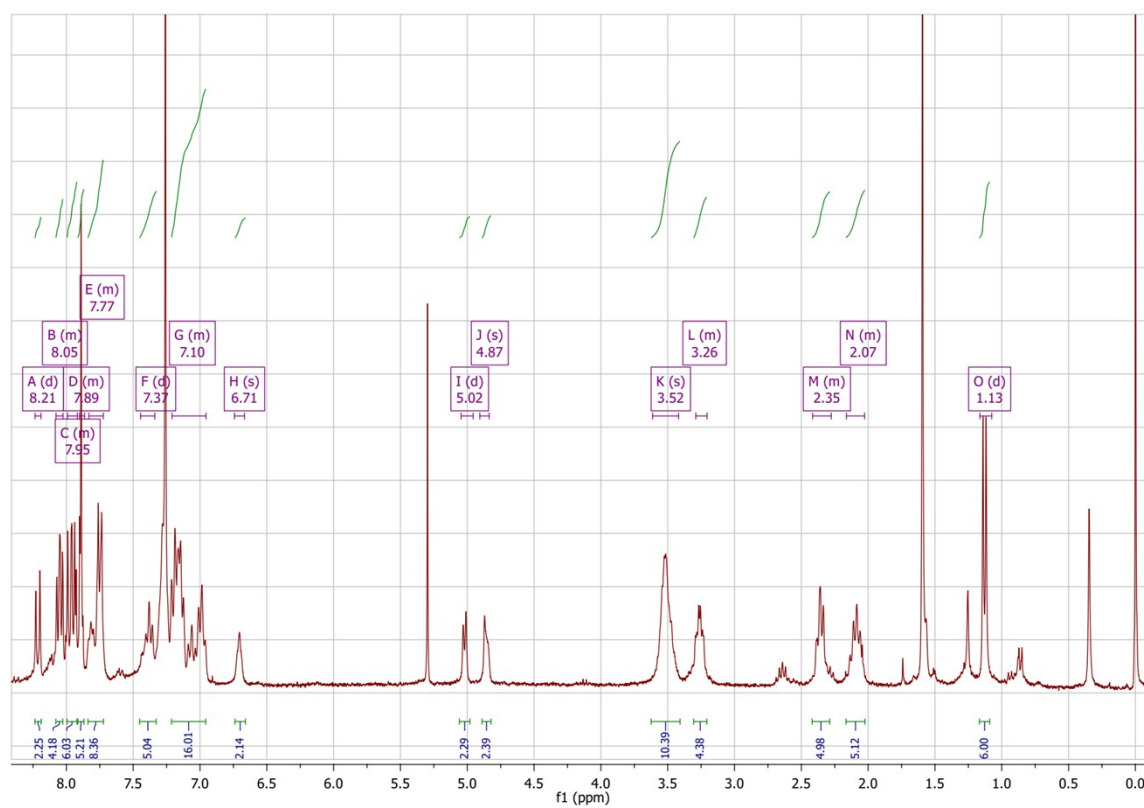

## 2 $^{13}\text{C}$ NMR (151 MHz, $\text{CDCl}_3$ )

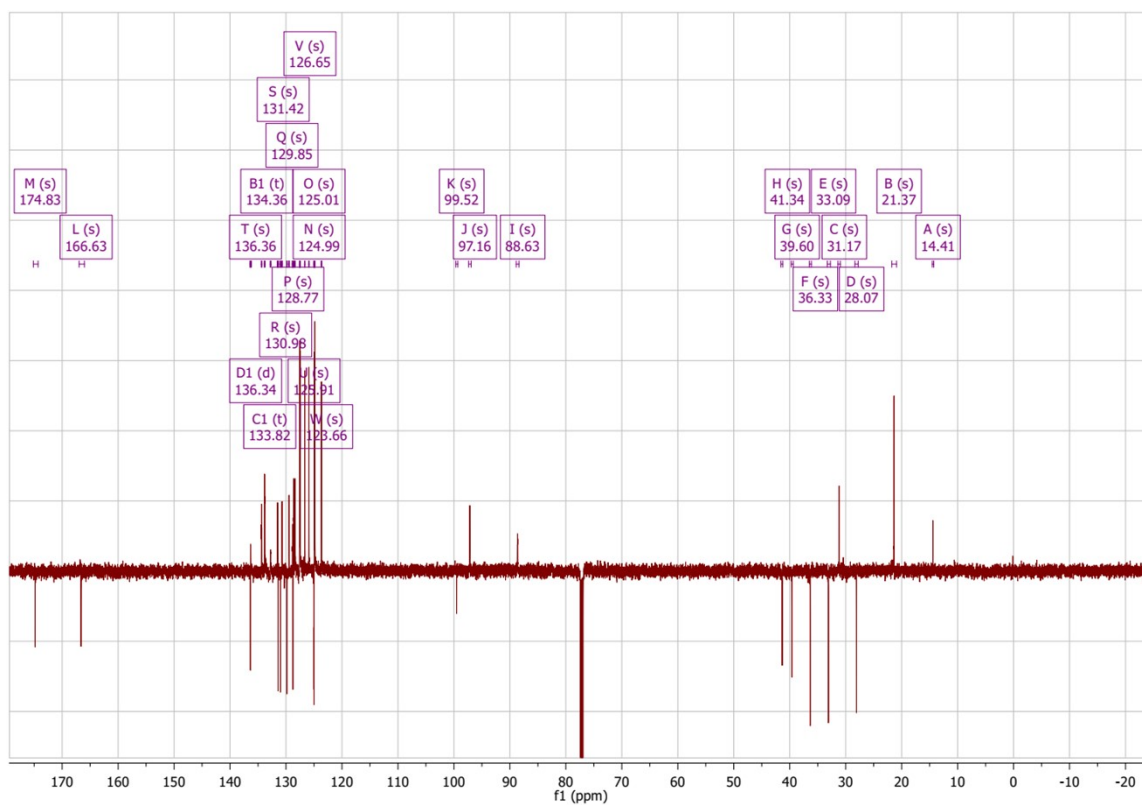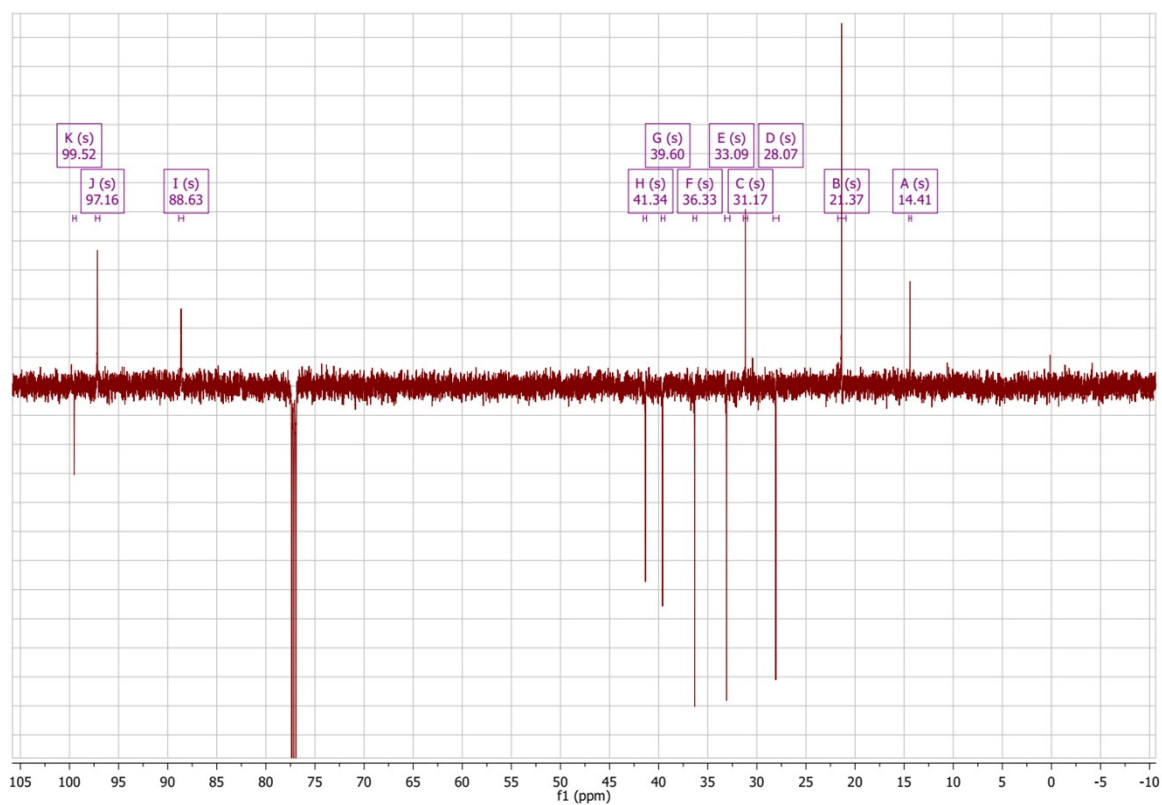

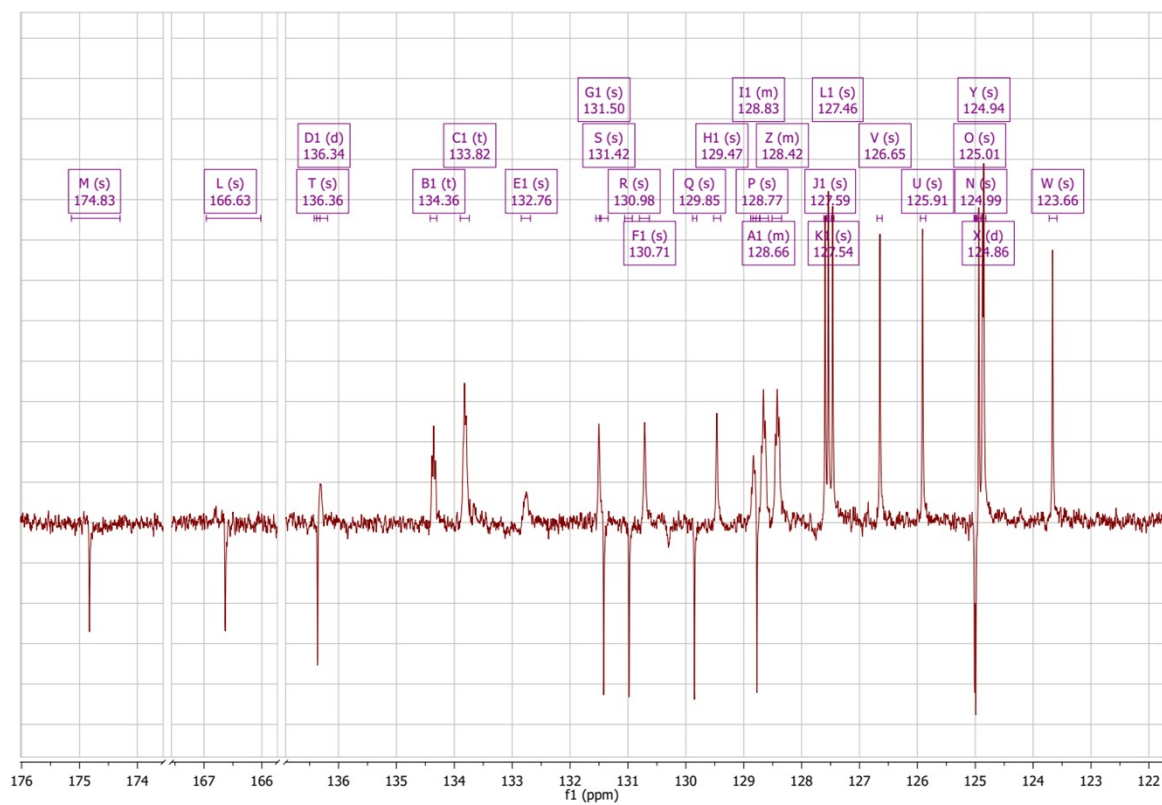

2 <sup>31</sup>P NMR (243 MHz, CDCl<sub>3</sub>)

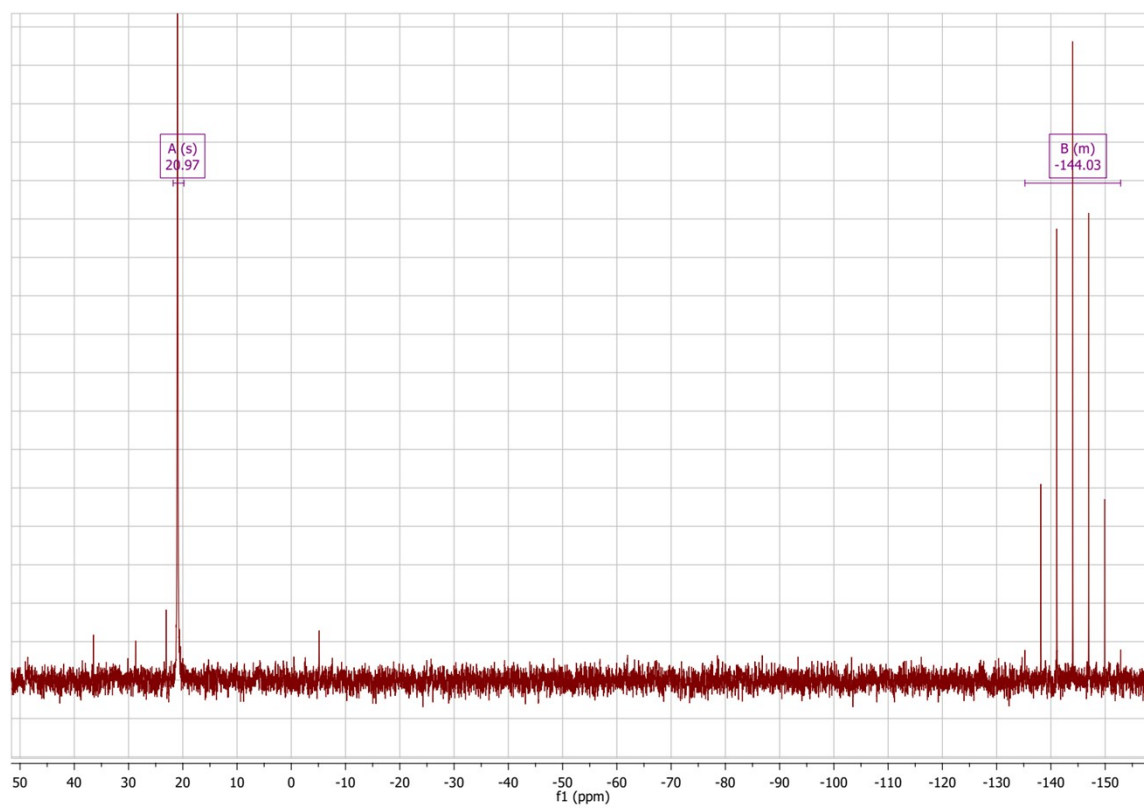

## UV/Vis Experiments

Variable concentration (and temperature) spectra of **1** in water

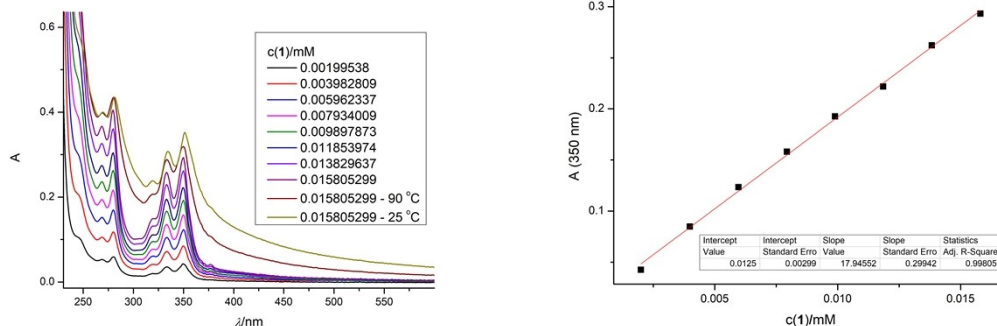

**Figure s2:** Left: A DMSO solution of **1** was added ( $c(\mathbf{1}) = 9.99 \times 10^{-4}$ ) to 1 ml of water, heating and cooling was done at the highest concentration measured, 1 cm path length,  $T = 25$ , additions of  $2 \mu\text{C}$ . Right: Linear fit at 350 nm.

Variable concentration spectra of **1** in DMSO

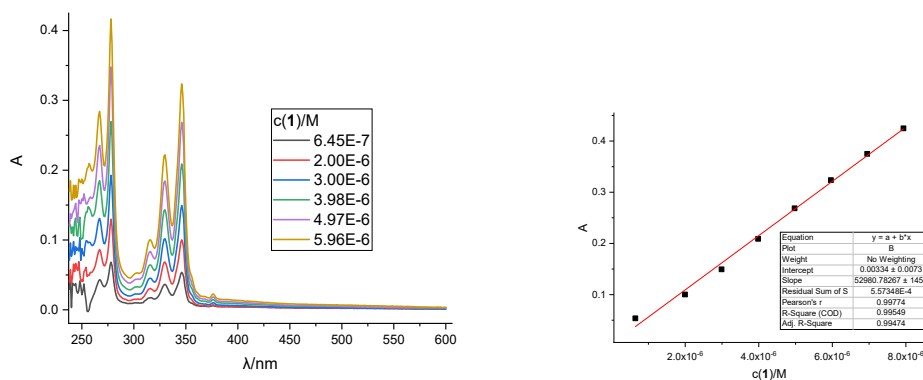

**Figure s3:** Left: A DMSO solution of **1** was added ( $c(\mathbf{1}) = 6.46 \times 10^{-4}$ ) to a 2 ml solution of DMSO, 1 cm path length,  $T = 25$  °C. Right: Linear fit at 346 nm.

Variable concentration (and temperature) spectra of **2** in DMSO

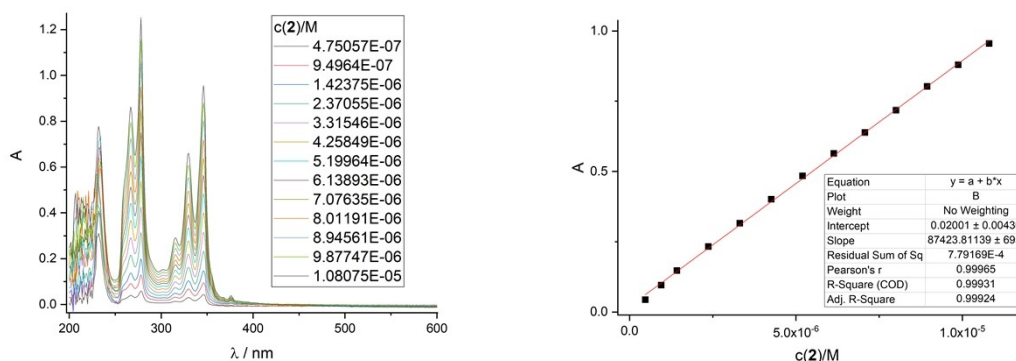

**Figure s4:** Left: A DMSO solution of **2** was added ( $c(\mathbf{2}) = 9.51 \times 10^{-4}$ ) to a 2 ml solution of DMSO, 1 cm path length,  $T = 25^\circ\text{C}$ . Right: Linear fit at 346 nm.

Variable concentration (and temperature) spectra of **2** in Na-cacodylate buffer

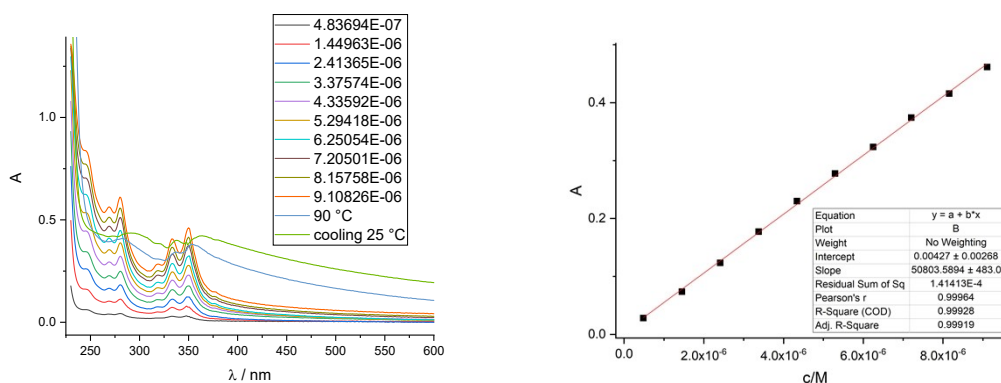

**Figure s5:** Left: A DMSO solution of **2** was added ( $c(\mathbf{2}) = 9.68 \times 10^{-4}$ ) to a 2 ml solution of Na-cacodylate buffer ( $\text{pH} = 7.0$ ,  $I = 0.05 \text{ mol dm}^{-3}$ ), heating and cooling was done at the highest concentration measured, 1 cm path length,  $T = 25^\circ\text{C}$ . Right: Linear fit at 350 nm.

dTM measurements

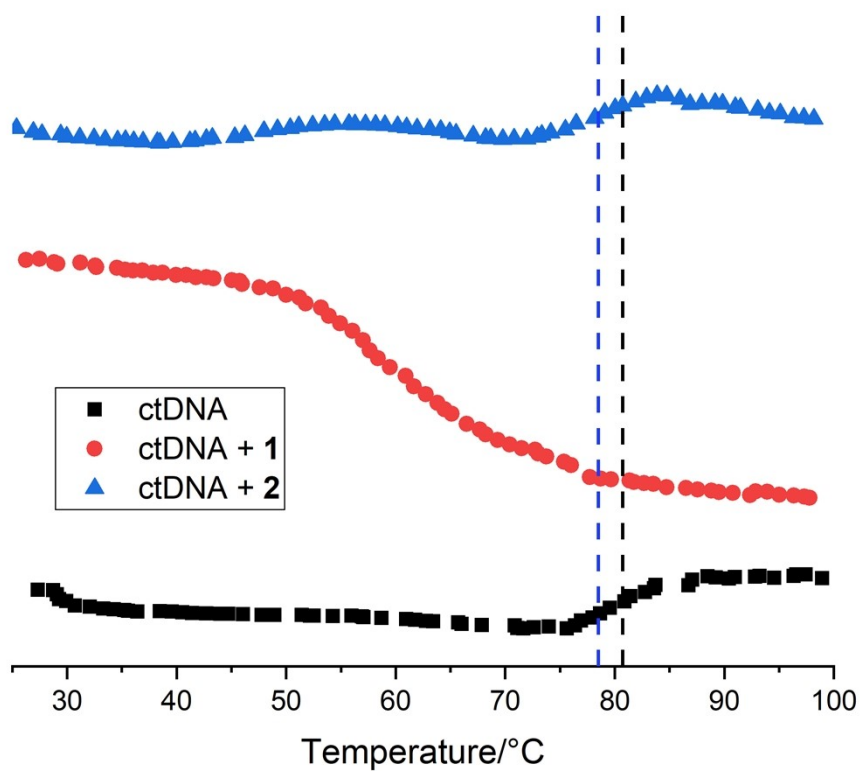

**Figure s6** dTM measurements of ctDNA and mixtures of ctDNA with **1** and **2**.  $r(\text{compound}/\text{ctDNA}) = 0.3$ .  $c(\text{ctDNA}) = 2 \times 10^{-5}$  M. Na-cacodylate buffer (pH = 7.0,  $I = 0.05$  mol  $\text{dm}^{-3}$ ), 1 cm path length.  $T_m(\text{ctDNA}) = 80.7$  °C,  $T_m(\text{ctDNA} + \mathbf{1})$  could not be determined,  $T_m(\text{ctDNA} + \mathbf{2}) = 78.5$  °C.



## Fluorescence experiments

Variable concentration spectra of **1** in DMSO

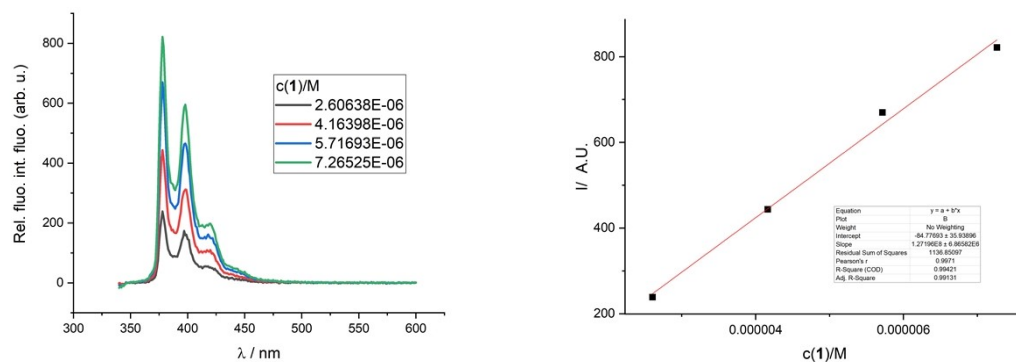

**Figure s7:** Left: A DMSO solution of **1** was added ( $c(2)=1.045 \times 10^{-3}$ ) to a 2 ml solution of DMSO, 1 cm path length,  $T = 25^\circ\text{C}$ ,  $\lambda_{\text{exc}} = 340$  nm, additions of 3-5  $\mu\text{l}$ . Right: Linear fit at 378 nm.

Excitation spectra of **1**

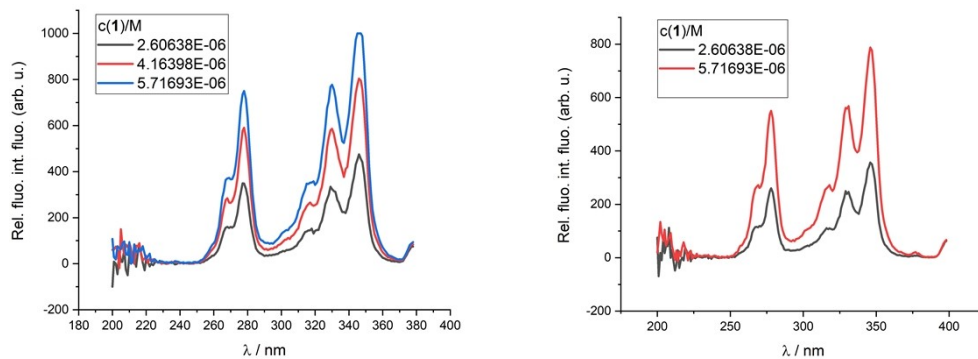

**Figure s8:** Excitation spectra of **1**. A DMSO solution of **1** was added ( $c(1)=1.045 \times 10^{-3}$ ) to a 2 ml solution of DMSO, 1 cm path length,  $T = 25^\circ\text{C}$ , , additions of 3-5  $\mu\text{l}$ . Left:  $\lambda_{\text{em}} = 378$  nm Right:  $\lambda_{\text{em}} = 398$  nm.

Variable concentration (and temperature) spectra of **2** in DMSO

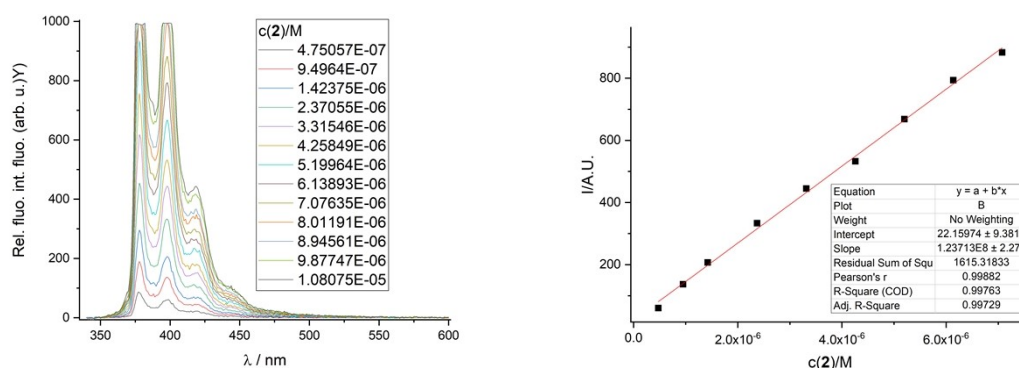

**Figure s9:** Left: A DMSO solution of **2** was added ( $c(\mathbf{2})=9.51 \times 10^{-4}$ ) to a 2 ml solution of DMSO, 1 cm path length,  $T = 25\text{ }^\circ\text{C}$ ,  $\lambda_{\text{exc}} = 340\text{ nm}$ . Right: Linear fit at 398 nm.

Variable concentration (and temperature) spectra of **2** in Na-cacodylate buffer

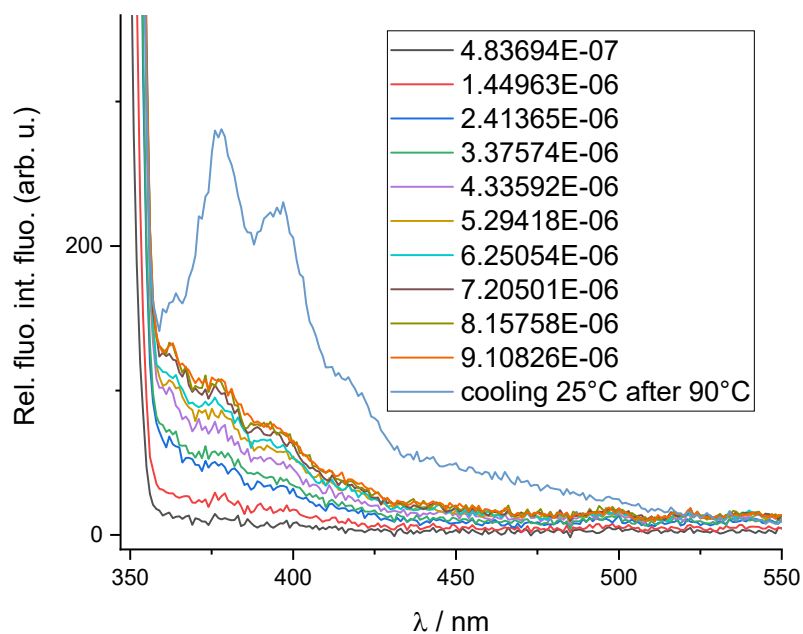

**Figure s10:** **2** was added ( $c(\mathbf{2}) = 9.68 \times 10^{-4}$ ) to a 2 ml solution of Na-cacodylate buffer ( $\text{pH} = 7.0$ ,  $I = 0.05\text{ mol dm}^{-3}$ ),  $\lambda_{\text{exc}} = 340\text{ nm}$ , 1 cm path length,  $T = 25\text{ }^\circ\text{C}$ .

BSA titration of **1**

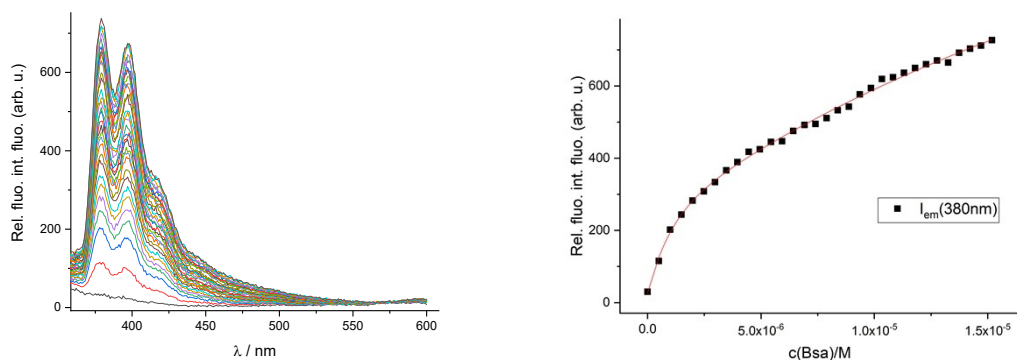

**Figure s11 Left:** Fluorimetric titration of **1** with BSA ( $c(\text{BSA}) = 1 \text{ mM}$ ),  $M$ ,  $c_0(\mathbf{1}) = 5.23 \times 10^{-6}$ ,  $\lambda_{\text{exc}} = 340 \text{ nm}$ , Na-cacodylate buffer ( $\text{pH} = 7.05$ ,  $I = 0.05 \text{ mol dm}^{-3}$ ),  $1 \text{ cm}$  path length,  $T = 25 \text{ }^\circ\text{C}$ , BSA additions of  $1 \text{ }\mu\text{l}$ , spectra are corrected for dilution. **Right:** Changes in fluorescence of **1** at  $380 \text{ nm}$  during the titration.

#### BSA titration of **2**

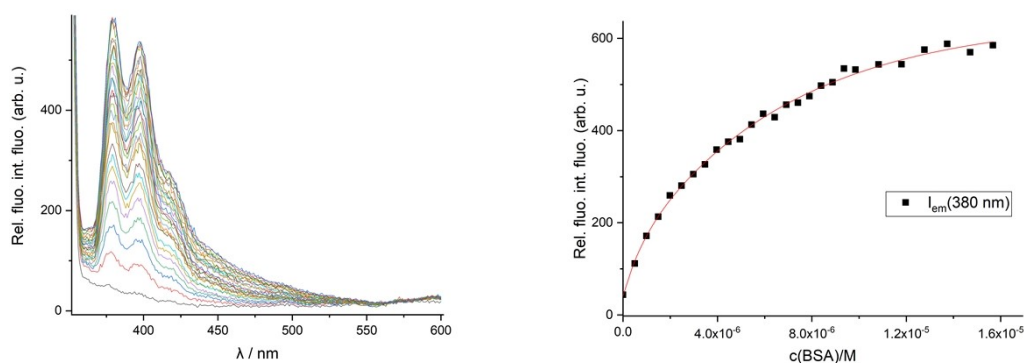

**Figure s12 Left:** Fluorimetric titration of **2** with BSA ( $c(\text{BSA}) = 1 \text{ mM}$ ),  $M$ ,  $c_0(\mathbf{2}) = 4.64 \times 10^{-6}$ ,  $\lambda_{\text{exc}} = 340 \text{ nm}$ , Na-cacodylate buffer ( $\text{pH} = 7.0$ ,  $I = 0.05 \text{ mol dm}^{-3}$ ),  $1 \text{ cm}$  path length,  $T = 25 \text{ }^\circ\text{C}$ , BSA additions of  $1\text{-}2 \text{ }\mu\text{l}$ , spectra are corrected for dilution. **Right:** Changes in fluorescence of **2** at  $380 \text{ nm}$  during the titration.

## Time resolved fluorescence measurements

For **1** and **2** in NaCaco, only samples with BSA added were successfully measured, samples without BSA had very low fluorescence.

**Table s1.** Measured relaxation times  $\tau$  and quantum yields for **1**, **2** and **L**.

| Compound (solvent)            | $\lambda_{\max}/\text{nm}$ | $\epsilon / \text{M}^{-1}\text{cm}^{-1}$ | $\Phi_f^a$ | $\lambda_{\text{em}}/\text{nm}^b$ | $\tau / \text{ns}$ (non-degassed)       | $\chi^2$ | $\tau / \text{ns}$ (degassed) <sup>c</sup> | $\chi^2$ |
|-------------------------------|----------------------------|------------------------------------------|------------|-----------------------------------|-----------------------------------------|----------|--------------------------------------------|----------|
| <b>1</b> (DMSO)               | 346                        | 52981                                    | 0.17       | -                                 | -                                       | -        | -                                          | -        |
| <b>1</b> (H <sub>2</sub> O)   | 350                        | 17945                                    | -          | -                                 | -                                       | -        | -                                          | -        |
| <b>1+BSA</b> (NaCaco)         | -                          | -                                        | -          | 419                               | 12.9 (17%)<br>41.6 (31%)<br>181.5 (53%) | 1.084    | 15.3 (61%) <sup>d</sup><br>123.7(39%)      | 1.539    |
| <b>2</b> (DMSO)               | 346                        | 87723                                    | 0.18       | -                                 | -                                       | -        | -                                          | -        |
| <b>2</b> (H <sub>2</sub> O)   | 350                        | 50766                                    | -          | -                                 | -                                       | -        | -                                          | -        |
| <b>2+BSA</b> (NaCaco)         | -                          | -                                        | -          | 419                               | 27.2(36 %)<br>169.1(64%)                | 1.194    | 22.1(51%)<br>130.8(49%)                    | 1.165    |
| <b>L</b> (NaCaco)             | 350                        | 28640                                    | 0.61       | 470                               | -                                       | -        | 32.2 (43%)<br>72.6 (57%)                   | 1.003    |
| <b>A<sup>1</sup></b> (NaCaco) | 342                        | 62596                                    | 0.15       | 377,<br>398,<br>418               | 94.0 (100%)                             | 1.068    | 2.5 (1%)<br>100.3(99.2%)                   | 1.060    |

<sup>a</sup> Absolute fluorescence quantum yield was determined by integrating sphere SC-30, Edinburgh Inst., for Argon purged solutions, by  $\lambda_{\text{exc}} = 340 \text{ nm}$  <sup>b</sup> Pulsing diode excitation at 340 nm. <sup>c</sup> Degassed by ultrasonic bath for 30 min, <sup>d</sup> the values could not be determined reliably.

## ctDNA titration of 1

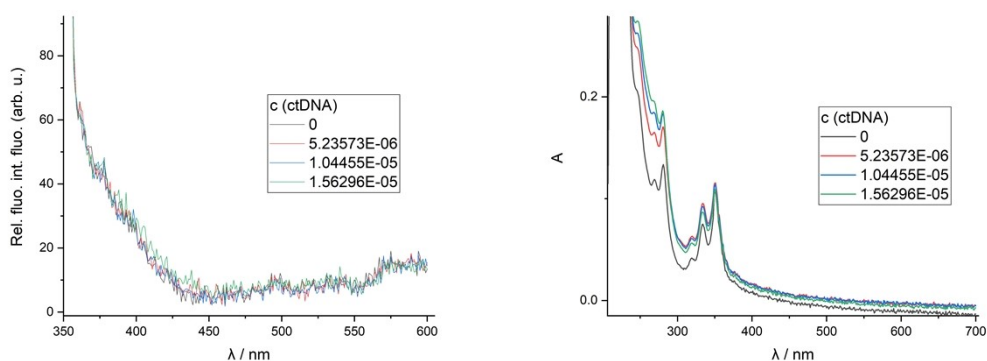

**Figure s15 Left:** Fluorimetric titration of **1** with ctDNA,  $c(\text{ctDNA}) = 2.11 \times 10^{-3} \text{ M}$ ,  $c_0(\mathbf{1}) = 4.89 \times 10^{-6}$ ,  $\lambda_{\text{exc}} = 340 \text{ nm}$ , Na-cacodylate buffer ( $\text{pH} = 7.0$ ,  $I = 0.05 \text{ mol dm}^{-3}$ ), 1 cm path length,  $T = 25 \text{ }^\circ\text{C}$ , additions of 5  $\mu\text{l}$ , spectra are not corrected for dilution. **Right:** Corresponding UV spectra.

## ctDNA titration of 2

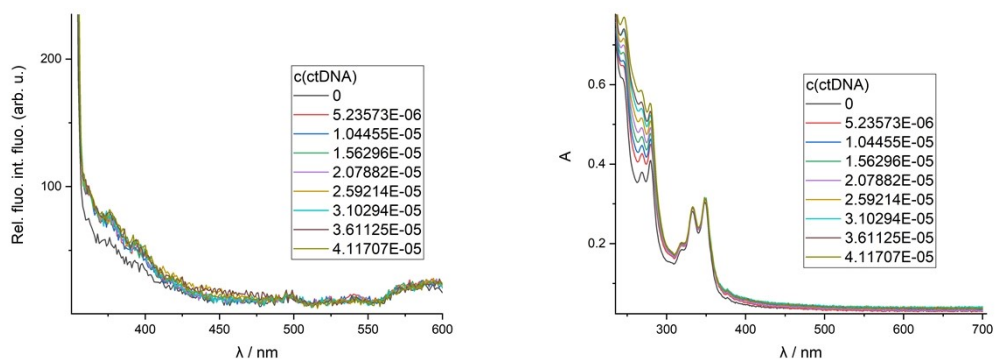

**Figure s16 Left:** Fluorimetric titration of **2** with ctDNA,  $c(\text{ctDNA}) = 2.11 \times 10^{-3} \text{ M}$ ,  $c_0(\mathbf{1}) = 4.92 \times 10^{-6}$ ,  $\lambda_{\text{exc}} = 340 \text{ nm}$ , Na-cacodylate buffer ( $\text{pH} = 7.0$ ,  $I = 0.05 \text{ mol dm}^{-3}$ ), 1 cm path length,  $T = 25 \text{ }^\circ\text{C}$ , additions of 5  $\mu\text{l}$ , spectra are not corrected for dilution. **Right:** Corresponding UV spectra.

## Competition experiments ES283 titration of ctDNA + ethidium bromide

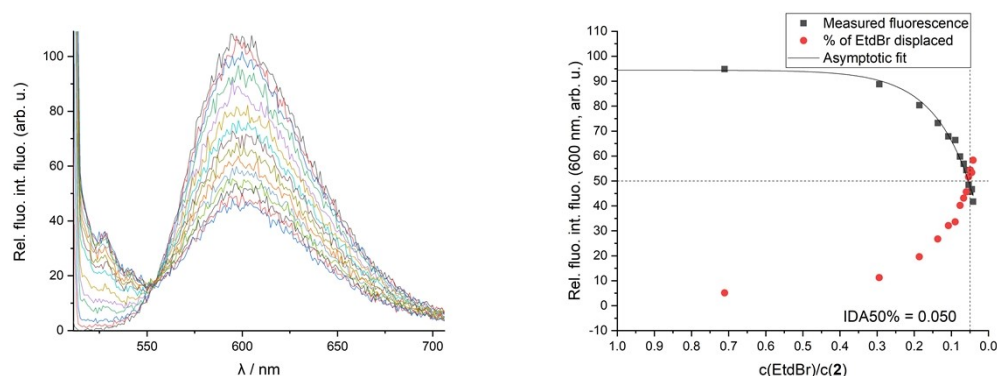

**Figure S17 Left:** Ethidium Bromide displacement assay,  $\lambda_{\text{exc}} = 505 \text{ nm}$ , Na-cacodylate buffer (pH = 7.0,  $I = 0.05 \text{ mol dm}^{-3}$ ),  $c_0(\text{ctDNA}) = 4.99 \times 10^{-5} \text{ M}$ ,  $c_0(\text{EtdBr}) = 4.96 \times 10^{-6} \text{ M}$ , 1 cm path length,  $T = 25 \text{ }^\circ\text{C}$ ,  $c(\mathbf{2}) = 2.02 \times 10^{-3} \text{ M}$  – additions of 2-10  $\mu\text{l}$ , baseline was subtracted and the spectra were corrected for dilution. **Right:** Changes in fluorescence of EtdBr at 600 nm during the titration,  $\text{IDA}_{50}(\mathbf{2}) = 0.050$ .

## Competition experiments ES282 titration of ctDNA + ethidium bromide

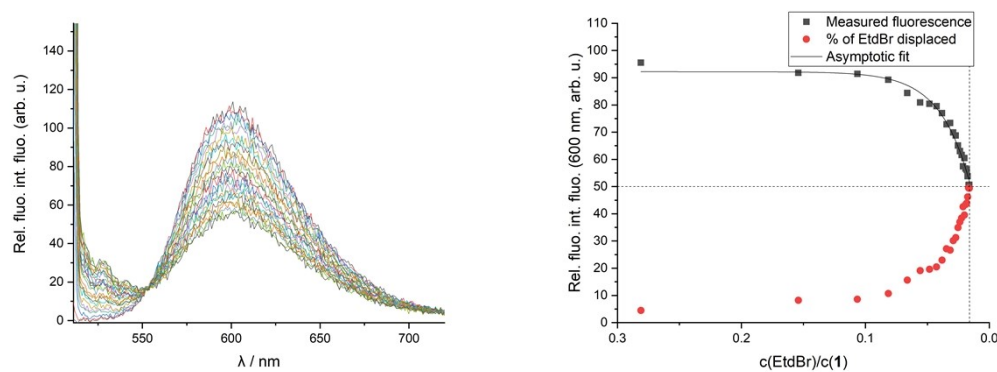

**Figure S18 Left:** Ethidium Bromide displacement assay,  $\lambda_{\text{exc}} = 505 \text{ nm}$ , Na-cacodylate buffer (pH = 7.0,  $I = 0.05 \text{ mol dm}^{-3}$ ),  $c_0(\text{ctDNA}) = 5.27 \times 10^{-5} \text{ M}$ ,  $c_0(\text{EtdBr}) = 4.96 \times 10^{-6} \text{ M}$ , 1 cm path length,  $T = 25 \text{ }^\circ\text{C}$ ,  $c(\mathbf{1}) = 2.98 \times 10^{-3} \text{ M}$  – additions of 2-10  $\mu\text{l}$ , baseline was subtracted and the spectra were corrected for dilution. **Right:** Changes in fluorescence of EtdBr at 600 nm during the titration,  $\text{IDA}_{50}(\mathbf{1}) = 0.016$ .

## CD spectroscopy

### Titration of **1** with ctDNA

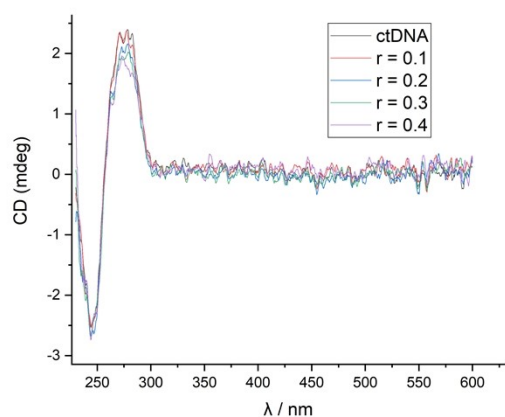

**Figure s19** Titration of ctDNA with **1**.  $c_0(\text{ctDNA})=1.95 \times 10^{-5}$ , Na-cacodylate buffer (pH = 7.0,  $I = 0.05 \text{ mol dm}^{-3}$ ), 1 cm path length,  $T = 25 \text{ }^\circ\text{C}$ , baseline was subtracted from each spectrum.

### Titration of **2** with ctDNA

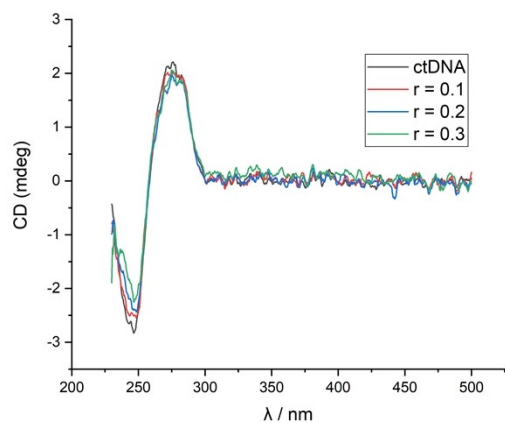

**Figure s20** Titration of ctDNA with **2**.  $c_0(\text{ctDNA})= 1.97 \times 10^{-5}$ , Na-cacodylate buffer (pH = 7.0,  $I = 0.05 \text{ mol dm}^{-3}$ ), 1 cm path length,  $T = 25 \text{ }^\circ\text{C}$ , baseline was subtracted from each spectra.

## Biology

### Toxicity on HeLa cells

| Compound | HeLa                       |                                          | Fibroblasts                |
|----------|----------------------------|------------------------------------------|----------------------------|
|          | IC <sub>50</sub> (μM) ± SD | IC <sub>50</sub> (μM) ± SD<br>λ = 300 nm | IC <sub>50</sub> (μM) ± SD |
| <b>1</b> | 5.13 ± 1.10                | 3.24±0.4                                 | 12 ± 2 .13                 |
| <b>2</b> | 12.50 ± 0.50               | 8.75±1.8                                 | 11.8 ± 1.1                 |

**Table s2.** IC<sub>50</sub> values of compounds **1** and **2** measured on HeLa cells with and without 300 nm irradiation and on fibroblasts.
